# Supplementary material for: Spontaneous Mutations Decrease Sensitivity of Gene Expression to Random Environmental Variation in Caenorhabditis elegans
Source: PubMed Central journal article supplement (PMC2807463; doi:10.1371/journal.pone.0008750), 2010-01-18

- 1 Figure S1 - Frequency distributions of  $CV_E$  of N2 and MA lines. Each gene is a single
- 2 data point. The distribution of N2 (open bars) is shown plotted against (A) MA24 (B)
- 3 MA41 (C) MA83 (D) MA99 (E) the mean of the four MA lines.

[A]

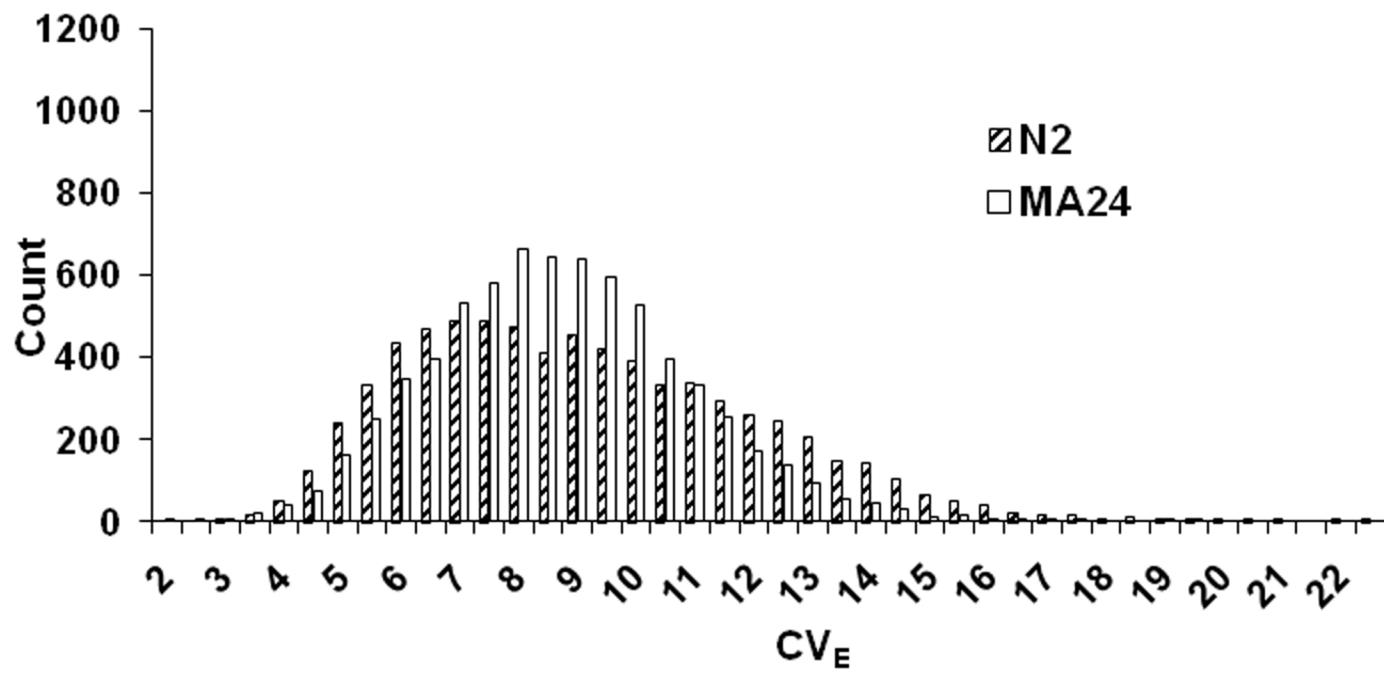

[B]

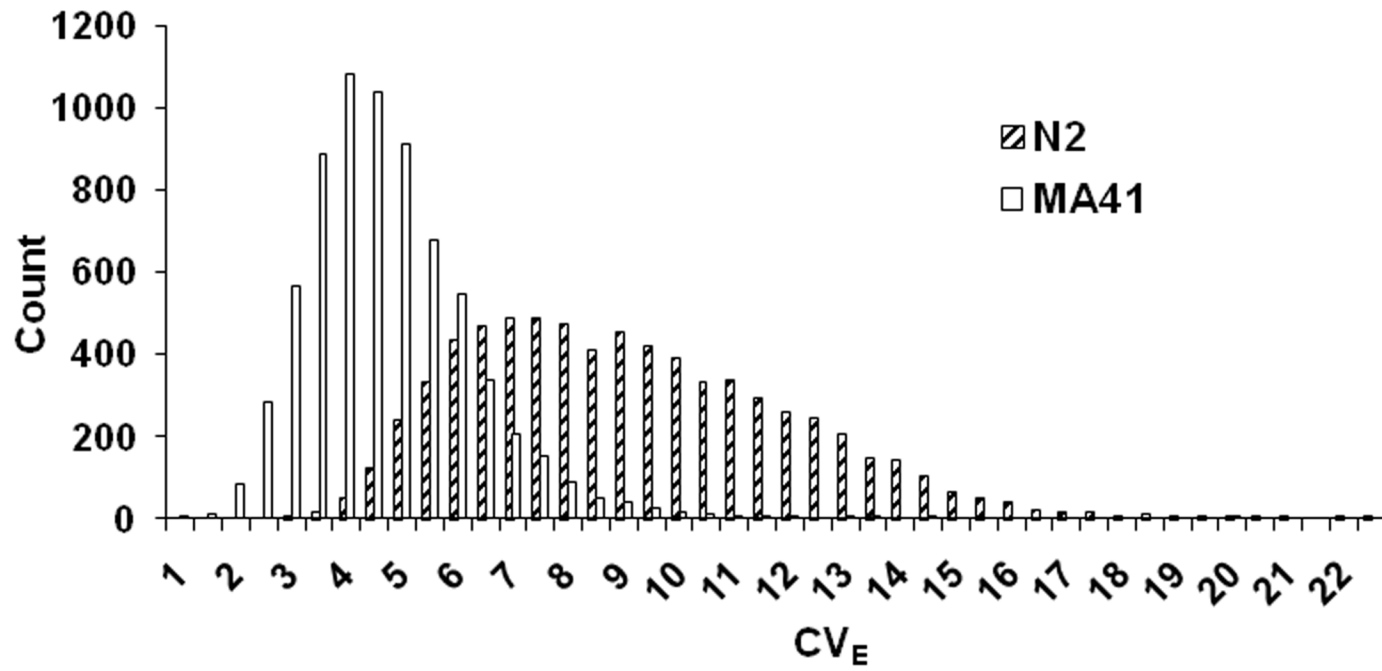

[C]

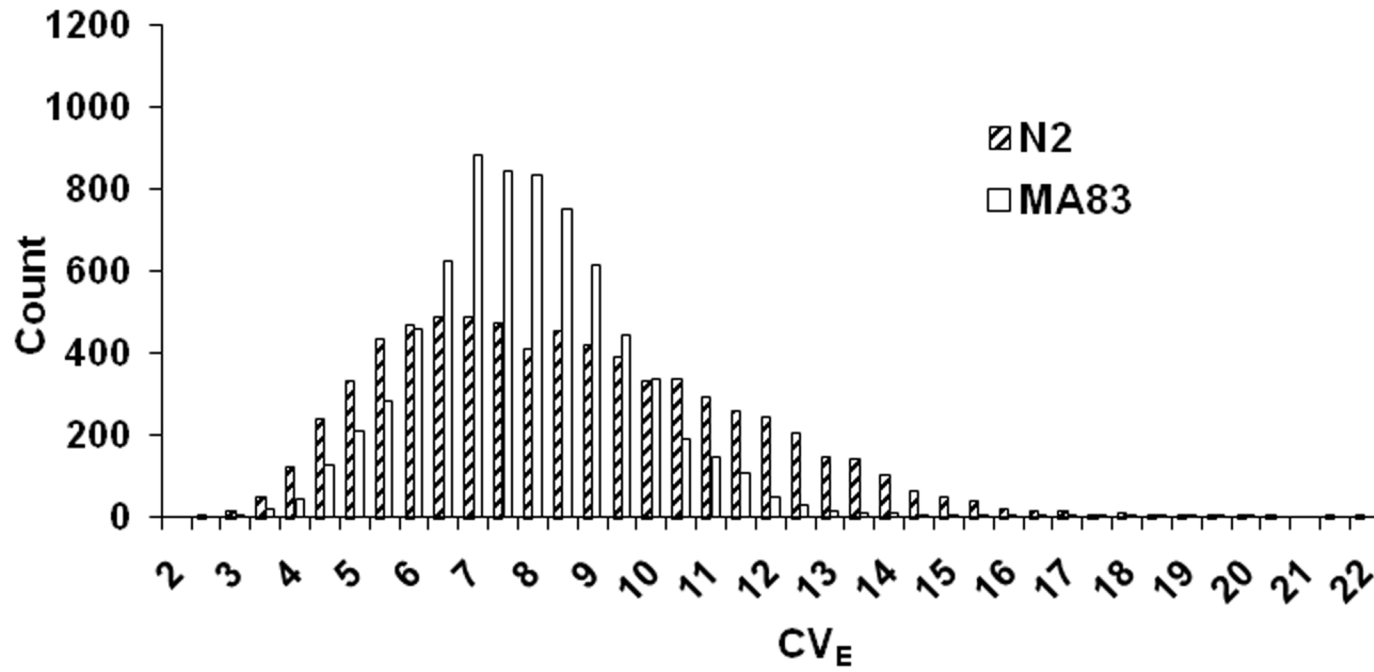

[D]

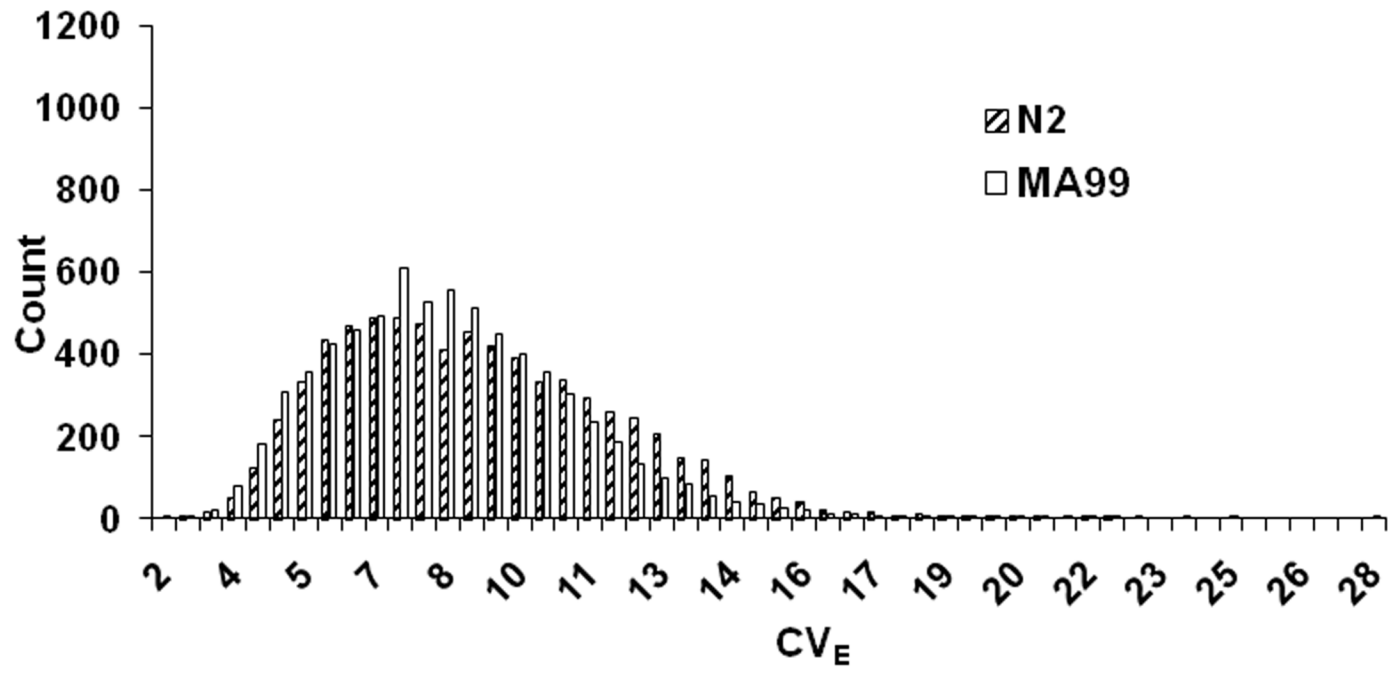

[E]

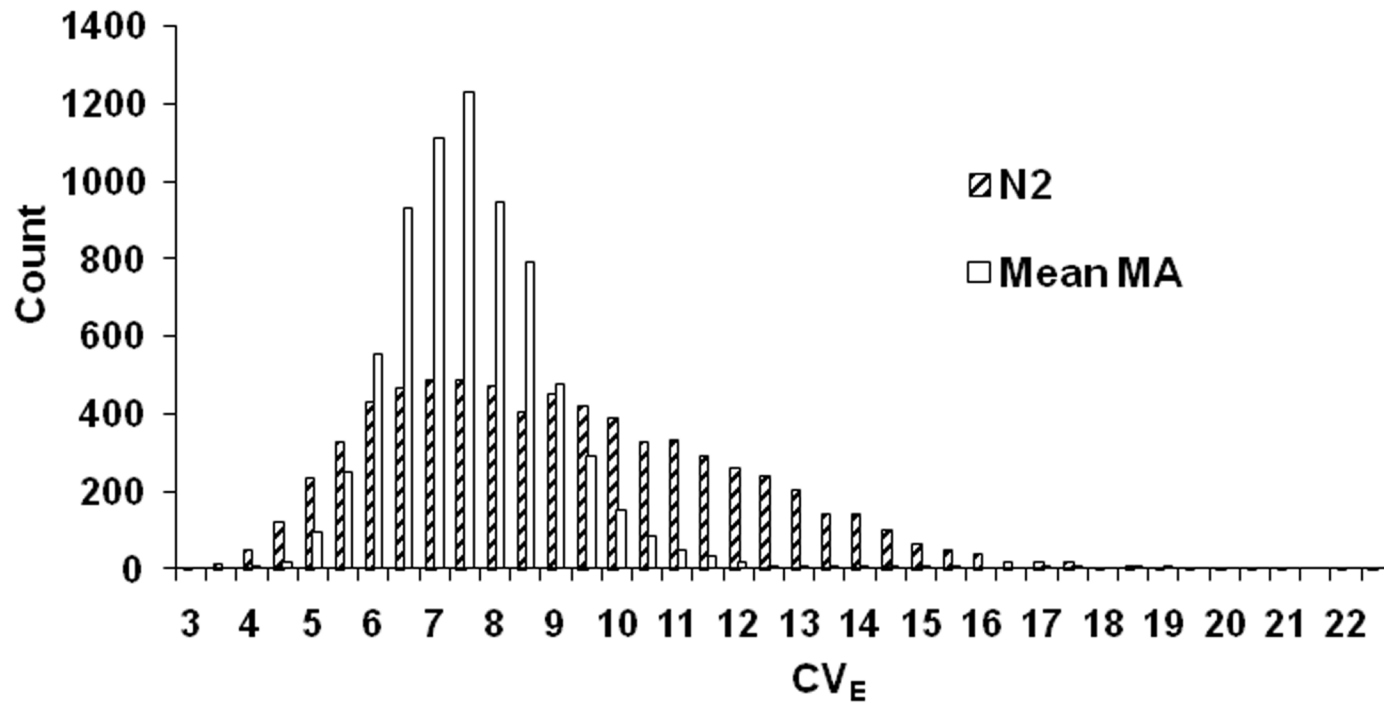

Supplement: pone.0008750.s001.pdf [file pone.0008750.s001.pdf]
